# Supplementary material for: Composition and Nutritional Quality of the Diet in Spanish Households during the First Wave of the COVID-19 Pandemic
Source: MDPI journal article supplement (doi:10.3390/nu13051443), 2021-04-24
Supplement: s1 [file s1]

**Table S1.** Food groups consumption by regions. Year 2020 and change versus 2019.

| JANUARY                 | CATALONIA |            | ARAGON |            | BALEARIC ISLANDS |            | VALENCIAN COMMUNITY |            | MURCIA |            | ANDALUSIA |            | COMMUNITY OF MADRID |            | CASTILE LA MANCHA |            |
|-------------------------|-----------|------------|--------|------------|------------------|------------|---------------------|------------|--------|------------|-----------|------------|---------------------|------------|-------------------|------------|
| (g/p/day)               | 2020      | Change (%) | 2020   | Change (%) | 2020             | Change (%) | 2020                | Change (%) | 2020   | Change (%) | 2020      | Change (%) | 2020                | Change (%) | 2020              | Change (%) |
| Cereals and derivatives | 161,8     | 1,7        | 141,9  | 4,1        | 189,0            | 9,1        | 172,0               | 4,5        | 155,4  | 6,1        | 154,3     | 6,9        | 147,3               | 4,4        | 159,1             | -8,4       |
| Milk and dairy products | 281,6     | 1,7        | 275,6  | 1,8        | 298,9            | 13,3       | 271,4               | 4,6        | 272,0  | -2,3       | 262,0     | 4,1        | 304,0               | 2,5        | 311,8             | -1,1       |
| Eggs                    | 24,9      | 10,0       | 30,6   | 32,4       | 23,8             | -3,9       | 24,7                | 11,6       | 19,9   | -13,8      | 22,5      | 11,0       | 24,8                | 8,8        | 23,8              | 10,8       |
| Sugar and sweets        | 22,9      | 4,6        | 22,7   | 5,8        | 28,9             | 20,1       | 26,4                | 8,4        | 23,0   | -7,0       | 22,0      | 3,4        | 23,4                | -2,4       | 25,0              | -0,5       |
| Oils and fats           | 29,5      | 0,5        | 34,9   | 41,2       | 37,3             | 12,8       | 24,4                | 16,3       | 16,1   | -21,6      | 27,4      | 8,2        | 25,6                | 7,5        | 20,9              | -30,5      |
| Vegetables              | 304,2     | 7,9        | 273,2  | 3,9        | 271,1            | 5,3        | 266,8               | 2,6        | 237,6  | -4,5       | 230,7     | 2,4        | 246,3               | 0,2        | 212,7             | 0,5        |
| Pulses                  | 17,4      | 7,4        | 15,9   | 4,2        | 13,4             | 5,7        | 14,4                | 17,0       | 11,6   | -17,0      | 11,8      | 4,4        | 13,4                | 3,5        | 14,5              | 8,4        |
| Fruits                  | 274,8     | 9,4        | 259,2  | 13,7       | 227,6            | 13,6       | 203,9               | -6,8       | 222,7  | 16,8       | 198,1     | 0,3        | 254,9               | -3,0       | 250,7             | 10,4       |
| Meat and meat products  | 140,8     | 4,2        | 148,2  | 3,0        | 139,5            | 5,1        | 132,2               | 3,6        | 109,3  | -2,8       | 120,9     | 5,2        | 131,6               | -1,4       | 141,3             | -3,5       |
| Fish and shellfish      | 60,0      | -5,9       | 68,8   | 6,1        | 51,1             | 3,4        | 52,6                | -6,9       | 47,9   | -11,3      | 50,8      | -0,4       | 62,3                | 2,1        | 58,0              | -0,6       |
| Alcoholic Beverages     | 67,8      | -0,3       | 44,9   | 10,3       | 102,5            | 14,4       | 64,0                | -10,0      | 61,0   | -5,3       | 68,6      | 5,8        | 73,1                | 19,3       | 56,5              | -8,5       |
| Non-alcoholic Beverages | 379,9     | 6,5        | 300,3  | 15,9       | 428,2            | -5,9       | 348,6               | 3,1        | 294,3  | -13,2      | 292,8     | -1,2       | 182,6               | 4,0        | 329,8             | -6,2       |
| Sauces and condiments   | 27,9      | 13,5       | 25,6   | 12,2       | 28,0             | 4,5        | 30,2                | 13,4       | 31,1   | -1,9       | 31,2      | 12,9       | 29,7                | 10,1       | 30,4              | -3,7       |
| Ready-to-eat-meals      | 63,4      | 5,2        | 58,3   | 34,0       | 64,7             | 32,9       | 50,2                | 16,0       | 42,8   | 3,3        | 49,6      | 8,1        | 53,9                | 10,9       | 46,1              | 4,1        |
| Appetizers              | 16,3      | 15,1       | 13,4   | 3,7        | 16,2             | 9,5        | 14,1                | -21,3      | 11,2   | 2,2        | 11,8      | 8,3        | 13,6                | 7,0        | 12,6              | 9,9        |

  

| JANUARY                 | EXTREMA-DURA |            | CASTILE AND LEON |            | GALICIA |            | ASTURIAS |            | CANTABRIA |            | BASQUE COUNTRY |            | LA RIOJA |            | NAVARRRE |            | CANARY ISLAND |            |
|-------------------------|--------------|------------|------------------|------------|---------|------------|----------|------------|-----------|------------|----------------|------------|----------|------------|----------|------------|---------------|------------|
| (g/p/day)               | 2020         | Change (%) | 2020             | Change (%) | 2020    | Change (%) | 2020     | Change (%) | 2020      | Change (%) | 2020           | Change (%) | 2020     | Change (%) | 2020     | Change (%) | 2020          | Change (%) |
| Cereals and derivatives | 140,7        | -2,7       | 183,9            | 2,1        | 202,4   | 1,5        | 184,6    | 5,2        | 167,9     | -5,3       | 175,1          | -3,5       | 159,0    | 6,8        | 171,1    | -0,04      | 158,2         | 6,3        |
| Milk and dairy products | 305,6        | -11,5      | 364,7            | -6,0       | 338,6   | -3,5       | 389,6    | 2,2        | 337,2     | -8,7       | 336,5          | -1,0       | 349,1    | 28,2       | 276,5    | -0,17      | 315,9         | 7,9        |
| Eggs                    | 19,6         | 0,0        | 25,4             | 10,0       | 24,8    | -1,7       | 27,2     | 17,4       | 25,5      | -8,7       | 31,6           | 15,9       | 20,5     | -25,2      | 27,0     | 0,20       | 22,1          | 12,2       |
| Sugar and sweets        | 26,3         | -9,4       | 24,7             | -4,9       | 31,5    | 3,3        | 37,7     | 20,6       | 27,9      | 2,8        | 28,7           | -10,2      | 32,1     | 30,8       | 25,9     | 0,01       | 29,6          | -8,3       |
| Oils and fats           | 22,5         | 16,3       | 38,0             | 2,0        | 41,5    | 9,7        | 36,8     | 16,7       | 39,2      | -18,0      | 32,9           | 16,4       | 46,3     | 129,1      | 34,5     | 0,31       | 32,6          | -2,3       |
| Vegetables              | 223,7        | 21,8       | 218,4            | 9,6        | 212,0   | 2,1        | 220,4    | -7,0       | 181,3     | -31,4      | 272,4          | 13,9       | 199,3    | -0,8       | 241,8    | 0,19       | 205,2         | -12,4      |
| Pulses                  | 12,2         | 9,1        | 15,7             | 23,7       | 13,8    | 23,1       | 17,2     | 3,0        | 17,2      | -27,7      | 18,1           | -0,6       | 9,7      | -41,8      | 12,7     | -0,31      | 10,9          | -0,4       |
| Fruits                  | 219,9        | 7,4        | 298,1            | 2,0        | 252,8   | -7,1       | 311,0    | 10,6       | 236,4     | -6,5       | 295,6          | -0,8       | 203,5    | -2,1       | 280,3    | 0,09       | 206,7         | -9,4       |
| Meat and meat products  | 113,2        | -0,9       | 163,6            | 8,9        | 153,7   | -6,6       | 130,8    | -5,5       | 117,4     | -14,7      | 135,9          | 2,5        | 144,1    | 6,5        | 138,9    | 0,30       | 99,4          | -9,1       |
| Fish and shellfish      | 53,6         | 16,0       | 73,1             | -6,6       | 69,7    | -12,5      | 79,8     | 26,2       | 49,9      | 1,1        | 70,0           | 4,8        | 58,2     | -10,0      | 65,2     | 0,42       | 39,5          | -1,7       |
| Alcoholic Beverages     | 56,2         | 10,0       | 56,8             | 20,1       | 53,6    | -7,9       | 53,9     | 2,0        | 62,8      | 40,5       | 55,7           | -0,8       | 43,5     | -14,6      | 59,9     | 0,44       | 61,4          | 15,7       |
| Non-alcoholic Beverages | 219,4        | -5,8       | 233,2            | -0,7       | 260,1   | -3,9       | 256,8    | 13,8       | 275,4     | -3,2       | 170,0          | -5,8       | 212,6    | 7,2        | 177,7    | -0,13      | 481,7         | 0,1        |
| Sauces and condiments   | 28,3         | 3,8        | 32,6             | 3,0        | 25,5    | 0,6        | 28,7     | -5,8       | 34,1      | -10,9      | 31,9           | 18,4       | 25,6     | 26,1       | 24,0     | 0,24       | 25,6          | 1,5        |
| Ready-to-eat-meals      | 42,0         | -3,1       | 43,6             | 18,3       | 33,9    | 5,9        | 34,9     | 9,3        | 48,3      | 12,4       | 40,4           | -8,0       | 52,9     | -4,5       | 40,1     | 0,29       | 34,7          | 3,1        |
| Appetizers              | 8,5          | -4,4       | 11,0             | 3,8        | 9,5     | 1,5        | 9,3      | -1,1       | 9,2       | -16,1      | 13,7           | 19,0       | 9,9      | 31,1       | 14,0     | 0,52       | 9,5           | 9,2        |

| FEBRUARY                | CATALONIA |            | ARAGON |            | BALEARIC ISLANDS |            | VALENCIAN COMMUNITY |            | MURCIA |            | ANDALUSIA |            | COMMUNITY OF MADRID |            | CASTILE LA MANCHA |            |
|-------------------------|-----------|------------|--------|------------|------------------|------------|---------------------|------------|--------|------------|-----------|------------|---------------------|------------|-------------------|------------|
| (g/p/day)               | 2020      | Change (%) | 2020   | Change (%) | 2020             | Change (%) | 2020                | Change (%) | 2020   | Change (%) | 2020      | Change (%) | 2020                | Change (%) | 2020              | Change (%) |
| Cereals and derivatives | 177,1     | 9,7        | 148,9  | 6,0        | 218,1            | 14,7       | 175,1               | 4,0        | 163,4  | -4,2       | 165,9     | 9,7        | 159,2               | 5,2        | 169,3             | 7,8        |
| Milk and dairy products | 292,3     | 2,6        | 313,0  | 16,3       | 299,8            | -3,7       | 272,0               | 2,7        | 293,6  | -0,8       | 273,0     | 7,7        | 315,7               | 3,5        | 301,2             | -0,4       |
| Eggs                    | 28,2      | 18,1       | 27,3   | 4,9        | 29,1             | 11,6       | 24,2                | 6,7        | 23,6   | -0,5       | 22,8      | 8,6        | 25,6                | 11,6       | 22,5              | 8,3        |
| Sugar and sweets        | 22,5      | 3,4        | 24,9   | 12,4       | 23,8             | -23,5      | 22,5                | 4,1        | 24,2   | 2,0        | 21,4      | 8,6        | 20,8                | 1,6        | 21,0              | -8,8       |
| Oils and fats           | 31,8      | 9,2        | 30,9   | 22,1       | 35,7             | -8,2       | 28,6                | 28,8       | 26,9   | 15,1       | 32,3      | 32,4       | 25,1                | 7,0        | 25,6              | 14,4       |
| Vegetables              | 352,5     | 15,0       | 305,7  | 2,1        | 303,3            | 0,9        | 294,3               | 7,0        | 275,7  | 7,7        | 248,6     | 10,9       | 282,5               | 13,2       | 223,5             | 1,6        |
| Pulses                  | 18,5      | 13,0       | 18,0   | 23,1       | 13,7             | -6,6       | 13,2                | 17,4       | 12,9   | -8,2       | 11,6      | 11,5       | 13,2                | 21,7       | 13,4              | 4,8        |
| Fruits                  | 297,0     | 7,2        | 274,0  | 6,2        | 279,6            | 17,8       | 243,9               | 7,7        | 249,9  | 21,2       | 222,1     | 9,0        | 291,4               | 10,1       | 248,1             | 3,0        |
| Meat and meat products  | 145,4     | 4,1        | 153,3  | 3,5        | 140,6            | 1,8        | 137,0               | 3,5        | 120,7  | -1,4       | 125,8     | 6,9        | 135,4               | 3,8        | 140,3             | -0,4       |
| Fish and shellfish      | 66,0      | 5,2        | 68,8   | 5,3        | 59,6             | 4,6        | 56,2                | -3,1       | 55,7   | 2,9        | 61,7      | 15,2       | 65,8                | 6,1        | 60,7              | 1,6        |
| Alcoholic Beverages     | 78,8      | 10,4       | 50,0   | 1,6        | 107,6            | 9,9        | 76,2                | 2,9        | 78,7   | -2,3       | 78,3      | 8,5        | 75,9                | 8,1        | 71,5              | 14,1       |
| Non-alcoholic Beverages | 390,5     | 5,6        | 336,9  | 5,6        | 489,8            | -6,0       | 376,7               | 9,0        | 384,2  | -3,5       | 328,4     | 8,5        | 197,5               | 4,9        | 325,7             | -8,4       |
| Sauces and condiments   | 30,6      | 17,9       | 23,6   | -16,6      | 36,4             | 8,1        | 27,2                | 8,6        | 35,4   | 17,4       | 30,6      | 4,4        | 30,4                | 13,4       | 31,1              | -0,9       |
| Ready-to-eat-meals      | 61,7      | 10,0       | 47,7   | -2,8       | 61,0             | 31,5       | 48,2                | 22,4       | 43,0   | 6,9        | 48,3      | 14,7       | 52,2                | 17,9       | 45,8              | 11,1       |
| Appetizers              | 17,3      | 4,3        | 14,7   | 2,5        | 18,9             | 33,0       | 15,1                | 13,8       | 14,8   | 9,3        | 13,5      | 17,5       | 14,8                | 10,5       | 12,9              | 26,4       |

| FEBRUARY                | EXTREMA-DURA |            | CASTILE AND LEON |            | GALICIA |            | ASTURIAS |            | CANTABRIA |            | BASQUE COUNTRY |            | LA RIOJA |            | NAVARRRE |            | CANARY ISLAND |            |
|-------------------------|--------------|------------|------------------|------------|---------|------------|----------|------------|-----------|------------|----------------|------------|----------|------------|----------|------------|---------------|------------|
| (g/p/day)               | 2020         | Change (%) | 2020             | Change (%) | 2020    | Change (%) | 2020     | Change (%) | 2020      | Change (%) | 2020           | Change (%) | 2020     | Change (%) | 2020     | Change (%) | 2020          | Change (%) |
| Cereals and derivatives | 126,6        | -11,6      | 184,4            | 0,5        | 203,7   | 3,6        | 197,9    | 11,4       | 185,8     | -5,2       | 174,8          | -5,5       | 181,3    | 43,0       | 201,7    | 8,4        | 162,4         | 1,5        |
| Milk and dairy products | 300,7        | -2,0       | 385,5            | 1,8        | 342,5   | -2,2       | 375,5    | -1,9       | 348,9     | -2,8       | 370,1          | 5,5        | 328,3    | 5,4        | 308,6    | -4,5       | 323,0         | 2,8        |
| Eggs                    | 16,9         | -18,6      | 25,8             | -4,4       | 26,6    | 19,7       | 26,9     | 19,0       | 28,1      | -5,2       | 32,4           | 22,0       | 27,9     | 15,8       | 30,6     | 11,7       | 22,5          | -1,2       |
| Sugar and sweets        | 17,6         | -14,7      | 25,0             | 5,5        | 30,1    | -2,4       | 31,1     | 14,8       | 21,3      | -14,6      | 26,4           | -7,4       | 29,8     | 34,4       | 32,0     | 29,2       | 27,0          | 2,5        |
| Oils and fats           | 20,2         | -12,4      | 39,6             | 27,3       | 42,5    | 0,4        | 36,8     | 24,5       | 46,3      | -10,3      | 35,7           | -0,5       | 21,8     | -11,7      | 35,5     | 23,6       | 35,2          | 14,2       |
| Vegetables              | 214,7        | -6,9       | 212,9            | -1,7       | 230,8   | 3,7        | 252,9    | 17,1       | 225,2     | -13,4      | 315,6          | 23,3       | 256,4    | 18,8       | 260,2    | 7,8        | 237,0         | 3,9        |
| Pulses                  | 10,9         | 13,8       | 11,9             | 7,8        | 13,7    | 9,5        | 16,8     | 24,6       | 14,2      | -10,4      | 17,9           | 20,7       | 13,7     | -2,8       | 16,8     | -2,6       | 11,3          | 2,1        |
| Fruits                  | 223,6        | -4,9       | 271,4            | -10,0      | 285,5   | -4,6       | 339,4    | 16,5       | 274,5     | -5,0       | 343,7          | 12,6       | 274,0    | 27,6       | 352,1    | 28,5       | 228,7         | -6,7       |
| Meat and meat products  | 113,6        | 4,9        | 153,9            | -2,4       | 154,1   | 12,8       | 121,7    | 2,3        | 124,8     | 0,8        | 143,4          | 2,5        | 153,0    | 5,9        | 147,2    | 13,7       | 113,7         | 10,9       |
| Fish and shellfish      | 50,5         | -7,1       | 73,0             | -6,4       | 68,3    | -12,7      | 78,9     | 12,9       | 60,2      | 1,0        | 73,2           | -2,5       | 71,1     | 4,3        | 63,3     | 14,4       | 37,2          | -7,9       |
| Alcoholic Beverages     | 51,6         | -7,1       | 59,9             | 22,4       | 52,2    | -0,5       | 55,0     | -15,3      | 59,8      | 29,8       | 62,3           | -5,4       | 51,3     | -3,2       | 70,4     | 58,2       | 77,3          | 28,7       |
| Non-alcoholic Beverages | 220,8        | -9,1       | 254,9            | 5,0        | 280,6   | 6,2        | 266,3    | 8,2        | 262,8     | -0,6       | 175,4          | -5,2       | 221,7    | -5,4       | 178,0    | 14,0       | 575,4         | 15,1       |
| Sauces and condiments   | 25,8         | 0,5        | 30,3             | -5,8       | 23,0    | 5,2        | 33,9     | 19,9       | 31,9      | -15,3      | 29,4           | 9,4        | 23,1     | -4,6       | 21,9     | -7,0       | 25,6          | -0,2       |
| Ready-to-eat-meals      | 36,6         | -2,3       | 42,9             | 20,2       | 27,9    | 8,2        | 33,6     | -3,1       | 63,9      | 51,5       | 41,4           | 5,8        | 63,0     | 61,2       | 44,3     | 58,8       | 38,5          | 19,2       |
| Appetizers              | 8,7          | -50,5      | 12,1             | 18,4       | 9,7     | 8,8        | 11,7     | 22,2       | 13,1      | 49,8       | 15,2           | 13,1       | 14,4     | 39,9       | 12,4     | 39,2       | 10,7          | 7,1        |

| MARCH                   | CATALONIA |            | ARAGON |            | BALEARIC ISLANDS |            | VALENCIAN COMMUNITY |            | MURCIA |            | ANDALUSIA |            | COMMUNITY OF MADRID |            | CASTILE LA MANCHA |            |
|-------------------------|-----------|------------|--------|------------|------------------|------------|---------------------|------------|--------|------------|-----------|------------|---------------------|------------|-------------------|------------|
| (g/p/day)               | 2020      | Change (%) | 2020   | Change (%) | 2020             | Change (%) | 2020                | Change (%) | 2020   | Change (%) | 2020      | Change (%) | 2020                | Change (%) | 2020              | Change (%) |
| Cereals and derivatives | 191,6     | 17,8       | 167,2  | 20,0       | 254,3            | 39,4       | 204,2               | 18,7       | 193,1  | 24,7       | 195,0     | 28,8       | 187,7               | 30,5       | 199,9             | 32,9       |
| Milk and dairy products | 308,5     | 11,8       | 333,8  | 24,3       | 337,2            | 17,8       | 324,0               | 19,3       | 387,6  | 42,1       | 316,3     | 22,9       | 355,9               | 21,7       | 367,0             | 25,1       |
| Eggs                    | 30,9      | 22,6       | 36,8   | 53,7       | 34,6             | 52,2       | 28,9                | 17,5       | 31,4   | 36,0       | 28,0      | 24,2       | 30,4                | 41,1       | 25,4              | 32,2       |
| Sugar and sweets        | 28,6      | 25,8       | 27,6   | 29,3       | 36,4             | 47,3       | 30,3                | 34,2       | 30,8   | 31,0       | 28,7      | 40,6       | 26,7                | 37,2       | 27,7              | 25,2       |
| Oils and fats           | 42,7      | 37,8       | 31,6   | 42,3       | 58,2             | 60,7       | 32,4                | 31,8       | 25,8   | 36,0       | 40,2      | 45,7       | 32,2                | 35,9       | 27,5              | 27,4       |
| Vegetables              | 363,5     | 17,3       | 339,6  | 18,5       | 382,7            | 37,9       | 331,8               | 24,1       | 323,0  | 38,3       | 294,3     | 28,0       | 302,2               | 20,7       | 272,0             | 21,9       |
| Pulses                  | 24,4      | 56,0       | 21,0   | 38,1       | 27,4             | 101,0      | 19,0                | 60,7       | 17,3   | 55,8       | 17,7      | 71,4       | 21,1                | 79,8       | 17,9              | 58,4       |
| Fruits                  | 312,3     | 10,1       | 311,0  | 13,1       | 326,2            | 37,1       | 261,2               | 5,9        | 251,1  | 27,0       | 252,7     | 18,6       | 303,3               | 12,9       | 268,6             | 14,4       |
| Meat and meat products  | 154,4     | 14,0       | 162,3  | 10,6       | 175,2            | 36,7       | 164,2               | 23,4       | 149,7  | 26,1       | 147,5     | 29,7       | 152,6               | 18,2       | 168,5             | 24,6       |
| Fish and shellfish      | 64,1      | -5,2       | 70,9   | 5,9        | 71,1             | 26,3       | 65,3                | 11,1       | 59,2   | 21,8       | 63,6      | 13,5       | 69,2                | 4,5        | 63,4              | 0,8        |
| Alcoholic Beverages     | 86,9      | 7,5        | 72,0   | 36,2       | 113,5            | 26,4       | 82,8                | 1,6        | 84,8   | 15,2       | 99,0      | 30,5       | 91,0                | 19,4       | 80,4              | 17,1       |
| Non-alcoholic Beverages | 414,3     | 8,1        | 348,9  | 20,7       | 556,0            | 18,5       | 413,1               | 11,4       | 365,9  | -2,2       | 361,9     | 11,6       | 209,4               | 11,7       | 375,3             | 9,4        |
| Sauces and condiments   | 32,3      | 13,3       | 34,4   | 53,2       | 38,3             | 30,8       | 35,7                | 30,4       | 42,0   | 35,9       | 41,2      | 40,1       | 37,5                | 37,7       | 40,4              | 32,6       |
| Ready-to-eat-meals      | 66,6      | 21,0       | 52,1   | 29,7       | 65,8             | 50,8       | 53,7                | 30,0       | 52,2   | 39,6       | 53,7      | 38,4       | 57,4                | 32,6       | 52,3              | 40,6       |
| Appetizers              | 18,0      | 8,5        | 15,8   | 22,9       | 18,1             | 28,5       | 18,1                | 25,2       | 18,2   | 44,9       | 15,1      | 27,6       | 17,9                | 25,7       | 14,5              | 22,6       |

| MARCH                   | EXTREMA-DURA |            | CASTILE AND LEON |            | GALICIA |            | ASTURIAS |            | CANTABRIA |            | BASQUE COUNTRY |            | LA RIOJA |            | NAVARRRE |            | CANARY ISLAND |            |
|-------------------------|--------------|------------|------------------|------------|---------|------------|----------|------------|-----------|------------|----------------|------------|----------|------------|----------|------------|---------------|------------|
| (g/p/day)               | 2020         | Change (%) | 2020             | Change (%) | 2020    | Change (%) | 2020     | Change (%) | 2020      | Change (%) | 2020           | Change (%) | 2020     | Change (%) | 2020     | Change (%) | 2020          | Change (%) |
| Cereals and derivatives | 172,6        | 22,5       | 197,7            | 5,7        | 239,3   | 24,3       | 222,4    | 28,5       | 215,2     | 29,4       | 204,5          | 16,5       | 177,9    | 26,6       | 210,1    | 22,6       | 220,1         | 43,7       |
| Milk and dairy products | 340,2        | 11,6       | 421,6            | 13,7       | 390,3   | 16,0       | 421,9    | 17,1       | 443,4     | 36,2       | 398,1          | 16,2       | 359,7    | 36,1       | 371,7    | 19,1       | 420,9         | 31,8       |
| Eggs                    | 26,1         | 27,5       | 30,3             | 18,1       | 30,0    | 7,9        | 28,5     | 30,5       | 34,8      | 16,7       | 35,0           | 22,2       | 22,3     | 16,4       | 31,6     | 25,8       | 27,0          | 39,9       |
| Sugar and sweets        | 25,3         | 26,9       | 28,7             | 15,6       | 38,6    | 19,8       | 34,4     | 23,9       | 38,6      | 44,5       | 32,2           | 25,0       | 28,1     | 27,3       | 30,3     | -12,7      | 37,3          | 43,8       |
| Oils and fats           | 32,8         | 72,7       | 40,8             | 25,7       | 46,2    | 19,5       | 38,7     | 37,1       | 48,9      | 56,1       | 40,6           | 10,2       | 31,9     | 28,9       | 40,8     | 79,5       | 40,3          | 42,8       |
| Vegetables              | 253,3        | 12,7       | 243,7            | 15,9       | 279,5   | 39,4       | 294,3    | 40,7       | 257,4     | 16,3       | 368,1          | 44,2       | 229,3    | 44,4       | 287,1    | 25,2       | 333,4         | 39,9       |
| Pulses                  | 16,4         | 79,0       | 18,8             | 48,2       | 14,5    | 18,1       | 19,9     | 48,4       | 33,8      | 173,5      | 20,3           | 48,7       | 15,5     | 59,0       | 23,1     | 96,3       | 19,6          | 74,4       |
| Fruits                  | 266,5        | 5,8        | 337,2            | 13,7       | 336,3   | 13,3       | 361,0    | 23,1       | 286,5     | 7,9        | 349,8          | 15,2       | 263,4    | 24,8       | 314,2    | 20,2       | 300,5         | 15,8       |
| Meat and meat products  | 138,9        | 22,4       | 177,6            | 12,9       | 153,8   | 12,3       | 143,0    | 18,9       | 141,1     | 8,5        | 153,6          | 15,0       | 159,5    | 40,0       | 167,9    | 35,3       | 158,6         | 42,8       |
| Fish and shellfish      | 59,6         | 24,3       | 85,2             | 6,1        | 74,5    | 4,7        | 85,8     | 14,4       | 72,0      | 31,2       | 76,3           | 9,8        | 63,7     | 9,7        | 69,2     | 16,1       | 64,5          | 64,1       |
| Alcoholic Beverages     | 66,0         | 12,8       | 68,5             | 26,3       | 73,6    | 22,3       | 81,2     | 13,9       | 100,2     | 99,1       | 85,1           | 32,5       | 70,2     | 35,9       | 80,8     | 42,2       | 87,8          | 46,6       |
| Non-alcoholic Beverages | 277,8        | 11,3       | 269,8            | 8,4        | 312,0   | 20,7       | 299,7    | 14,4       | 375,3     | 28,2       | 195,7          | 9,0        | 206,6    | -5,6       | 213,2    | 2,8        | 705,6         | 32,9       |
| Sauces and condiments   | 37,6         | 25,2       | 34,6             | 22,4       | 27,9    | 20,5       | 30,9     | 12,4       | 41,5      | 17,8       | 37,5           | 27,3       | 26,8     | 29,5       | 33,9     | 20,5       | 39,1          | 49,1       |
| Ready-to-eat-meals      | 49,4         | 33,7       | 41,0             | 21,5       | 31,1    | 32,6       | 35,5     | 23,3       | 53,0      | 27,4       | 45,2           | 27,7       | 48,8     | 22,3       | 47,4     | 53,9       | 51,3          | 49,6       |
| Appetizers              | 12,1         | 17,5       | 16,0             | 49,9       | 11,6    | 21,0       | 22,3     | 116,8      | 17,5      | 79,7       | 16,8           | 27,5       | 15,3     | 33,5       | 14,2     | 18,2       | 14,1          | 43,7       |

| APRIL                   | CATALONIA |            | ARAGON |            | BALEARIC ISLANDS |            | VALENCIAN COMMUNITY |            | MURCIA |            | ANDALUSIA |            | COMMUNITY OF MADRID |            | CASTILE LA MANCHA |            |
|-------------------------|-----------|------------|--------|------------|------------------|------------|---------------------|------------|--------|------------|-----------|------------|---------------------|------------|-------------------|------------|
| (g/p/day)               | 2020      | Change (%) | 2020   | Change (%) | 2020             | Change (%) | 2020                | Change (%) | 2020   | Change (%) | 2020      | Change (%) | 2020                | Change (%) | 2020              | Change (%) |
| Cereals and derivatives | 207,9     | 28,4       | 189,7  | 45,5       | 266,9            | 33,8       | 211,7               | 30,6       | 219,1  | 47,5       | 206,3     | 33,9       | 209,8               | 47,3       | 210,5             | 37,2       |
| Milk and dairy products | 334,1     | 22,3       | 365,2  | 33,6       | 360,0            | 17,6       | 339,5               | 27,6       | 337,7  | 34,8       | 327,4     | 17,3       | 394,2               | 31,5       | 405,0             | 34,8       |
| Eggs                    | 38,2      | 52,9       | 43,7   | 71,0       | 40,3             | 61,4       | 39,2                | 59,7       | 32,3   | 37,2       | 35,2      | 51,5       | 39,5                | 79,3       | 31,5              | 53,3       |
| Sugar and sweets        | 35,1      | 45,8       | 33,9   | 51,2       | 48,0             | 45,6       | 35,0                | 47,1       | 34,6   | 65,2       | 34,4      | 56,0       | 34,5                | 67,7       | 34,0              | 43,0       |
| Oils and fats           | 38,4      | 31,5       | 47,9   | 69,5       | 49,9             | 3,8        | 30,4                | 27,0       | 30,4   | 18,9       | 43,7      | 40,2       | 34,7                | 38,8       | 31,4              | 17,9       |
| Vegetables              | 410,4     | 49,5       | 422,5  | 60,1       | 487,4            | 77,3       | 372,6               | 49,9       | 356,3  | 44,1       | 343,2     | 43,4       | 378,9               | 59,6       | 304,3             | 38,5       |
| Pulses                  | 21,0      | 53,3       | 17,2   | 28,9       | 22,9             | 86,3       | 16,8                | 63,2       | 18,1   | 52,1       | 14,4      | 49,7       | 17,0                | 54,3       | 14,8              | 26,3       |
| Fruits                  | 375,9     | 36,0       | 388,5  | 59,0       | 418,9            | 64,3       | 322,0               | 35,3       | 356,6  | 53,3       | 296,6     | 38,4       | 380,6               | 48,6       | 308,0             | 28,2       |
| Meat and meat products  | 173,1     | 33,0       | 187,8  | 33,5       | 175,7            | 27,8       | 175,3               | 40,2       | 146,9  | 38,2       | 157,3     | 36,6       | 182,2               | 44,7       | 177,3             | 39,8       |
| Fish and shellfish      | 81,8      | 27,3       | 82,0   | 22,9       | 68,9             | 1,3        | 73,5                | 27,4       | 71,8   | 37,9       | 74,5      | 30,0       | 80,7                | 25,3       | 76,0              | 27,9       |
| Alcoholic Beverages     | 131,4     | 64,9       | 134,7  | 128,2      | 162,3            | 23,4       | 115,5               | 44,7       | 132,8  | 62,1       | 137,9     | 81,8       | 136,3               | 80,9       | 116,3             | 65,2       |
| Non-alcoholic Beverages | 468,4     | 26,7       | 425,7  | 48,7       | 617,2            | 16,1       | 482,8               | 37,9       | 442,2  | 26,8       | 406,3     | 26,8       | 249,5               | 29,0       | 423,2             | 34,2       |
| Sauces and condiments   | 37,6      | 46,5       | 33,2   | 26,5       | 40,2             | 46,1       | 39,4                | 39,4       | 42,1   | 29,6       | 43,4      | 44,9       | 46,3                | 71,9       | 42,2              | 40,5       |
| Ready-to-eat-meals      | 68,1      | 25,0       | 54,4   | 47,2       | 55,5             | 18,4       | 53,0                | 33,7       | 49,8   | 25,5       | 49,4      | 21,8       | 59,7                | 39,6       | 49,4              | 20,5       |
| Appetizers              | 25,7      | 51,9       | 23,7   | 88,6       | 26,8             | 66,9       | 22,0                | 14,6       | 22,5   | 78,1       | 19,5      | 57,9       | 25,3                | 86,9       | 20,7              | 69,3       |

| APRIL                   | EXTREMA-DURA |            | CASTILE AND LEON |            | GALICIA |            | ASTURIAS |            | CANTABRIA |            | BASQUE COUNTRY |            | LA RIOJA |            | NAVARRRE |            | CANARY ISLAND |            |
|-------------------------|--------------|------------|------------------|------------|---------|------------|----------|------------|-----------|------------|----------------|------------|----------|------------|----------|------------|---------------|------------|
| (g/p/day)               | 2020         | Change (%) | 2020             | Change (%) | 2020    | Change (%) | 2020     | Change (%) | 2020      | Change (%) | 2020           | Change (%) | 2020     | Change (%) | 2020     | Change (%) | 2020          | Change (%) |
| Cereals and derivatives | 189,2        | 47,2       | 220,7            | 20,9       | 251,1   | 23,5       | 242,1    | 48,1       | 229,2     | 36,5       | 229,2          | 29,5       | 176,5    | 29,8       | 242,1    | 41,4       | 215,4         | 38,8       |
| Milk and dairy products | 395,8        | 29,7       | 425,6            | 14,5       | 444,2   | 26,2       | 477,4    | 37,9       | 388,1     | 32,2       | 429,4          | 26,8       | 420,7    | 59,7       | 411,3    | 18,3       | 419,3         | 47,2       |
| Eggs                    | 26,6         | 40,6       | 38,3             | 38,6       | 38,8    | 53,0       | 43,1     | 107,5      | 40,7      | 64,8       | 46,7           | 72,5       | 35,9     | 78,3       | 49,2     | 109,5      | 33,7          | 58,7       |
| Sugar and sweets        | 28,2         | 64,3       | 35,8             | 39,1       | 40,7    | 38,4       | 43,2     | 48,4       | 37,1      | 80,1       | 40,4           | 53,3       | 32,5     | 97,5       | 34,1     | 33,8       | 42,9          | 67,8       |
| Oils and fats           | 30,9         | 41,2       | 44,6             | 20,6       | 48,7    | 27,3       | 43,7     | 61,0       | 45,8      | 49,7       | 40,4           | 14,2       | 28,7     | 9,3        | 34,1     | 18,8       | 47,7          | 60,5       |
| Vegetables              | 311,6        | 58,0       | 297,7            | 35,7       | 323,9   | 45,0       | 336,9    | 75,2       | 276,7     | 10,4       | 400,5          | 52,0       | 267,9    | 19,9       | 363,8    | 59,7       | 385,4         | 68,3       |
| Pulses                  | 13,3         | 36,4       | 19,0             | 90,1       | 13,1    | -4,2       | 15,9     | 46,1       | 19,7      | 31,3       | 19,7           | 60,4       | 12,4     | 57,8       | 14,3     | 36,3       | 14,3          | 37,7       |
| Fruits                  | 307,8        | 41,9       | 387,6            | 31,4       | 396,0   | 30,4       | 432,7    | 51,9       | 354,3     | 41,3       | 424,3          | 36,0       | 332,1    | 35,6       | 398,7    | 57,2       | 333,6         | 49,7       |
| Meat and meat products  | 148,1        | 33,2       | 189,2            | 28,0       | 155,8   | 14,5       | 152,2    | 32,6       | 150,8     | 23,2       | 178,9          | 36,0       | 180,1    | 57,1       | 179,2    | 45,8       | 160,5         | 57,2       |
| Fish and shellfish      | 73,6         | 35,0       | 85,3             | 17,5       | 101,0   | 36,0       | 99,1     | 44,2       | 77,9      | 13,2       | 103,9          | 38,3       | 72,1     | 1,0        | 81,0     | 30,2       | 65,8          | 30,1       |
| Alcoholic Beverages     | 103,8        | 55,6       | 103,8            | 84,2       | 103,1   | 55,3       | 121,8    | 116,7      | 106,9     | 80,7       | 135,4          | 146,2      | 123,5    | 150,2      | 167,2    | 183,8      | 125,4         | 109,6      |
| Non-alcoholic Beverages | 317,6        | 26,8       | 319,7            | 31,5       | 330,7   | 21,3       | 327,2    | 26,6       | 311,7     | 16,2       | 253,2          | 61,9       | 229,6    | 14,7       | 220,3    | 20,6       | 650,9         | 21,1       |
| Sauces and condiments   | 34,6         | 43,3       | 38,4             | 25,4       | 32,3    | 26,6       | 36,8     | 47,2       | 47,3      | 45,4       | 39,8           | 41,1       | 28,2     | 50,7       | 41,7     | 89,3       | 39,8          | 67,4       |
| Ready-to-eat-meals      | 44,0         | 22,0       | 44,2             | 33,8       | 31,6    | 38,6       | 37,5     | 24,5       | 49,5      | 60,7       | 43,8           | 23,3       | 51,0     | 39,6       | 52,1     | 52,3       | 45,6          | 20,6       |
| Appetizers              | 16,2         | 57,3       | 22,5             | 75,3       | 16,1    | 64,0       | 20,4     | 114,6      | 20,3      | 79,0       | 26,9           | 95,4       | 23,7     | 107,6      | 20,8     | 51,3       | 16,8          | 52,8       |

| MAY                     | CATALONIA |            | ARAGON |            | BALEARIC ISLANDS |            | VALENCIAN COMMUNITY |            | MURCIA |            | ANDALUSIA |            | COMMUNITY OF MADRID |            | CASTILE LA MANCHA |            |
|-------------------------|-----------|------------|--------|------------|------------------|------------|---------------------|------------|--------|------------|-----------|------------|---------------------|------------|-------------------|------------|
| (g/p/day)               | 2020      | Change (%) | 2020   | Change (%) | 2020             | Change (%) | 2020                | Change (%) | 2020   | Change (%) | 2020      | Change (%) | 2020                | Change (%) | 2020              | Change (%) |
| Cereals and derivatives | 188,3     | 22,3       | 155,2  | 24,3       | 202,3            | 12,6       | 187,8               | 15,5       | 164,9  | 11,5       | 177,7     | 27,0       | 175,5               | 30,0       | 189,2             | 32,4       |
| Milk and dairy products | 312,0     | 6,4        | 334,1  | 24,8       | 343,2            | 13,3       | 313,5               | 14,3       | 304,3  | 22,2       | 304,4     | 17,0       | 358,9               | 24,1       | 356,7             | 13,3       |
| Eggs                    | 34,5      | 52,4       | 34,0   | 23,1       | 28,8             | 23,4       | 31,3                | 33,0       | 30,5   | 41,8       | 27,9      | 35,4       | 33,1                | 47,9       | 27,1              | 53,1       |
| Sugar and sweets        | 27,1      | 31,6       | 24,8   | 36,1       | 29,7             | 31,1       | 25,4                | 16,6       | 27,4   | 45,0       | 25,0      | 47,2       | 26,4                | 52,2       | 27,5              | 53,1       |
| Oils and fats           | 36,9      | 30,0       | 38,2   | 45,2       | 45,0             | 23,4       | 29,0                | 15,5       | 26,8   | 56,7       | 37,9      | 47,5       | 33,7                | 35,5       | 30,4              | 40,2       |
| Vegetables              | 388,7     | 55,6       | 362,1  | 31,5       | 426,0            | 57,7       | 329,0               | 24,2       | 324,2  | 42,2       | 305,0     | 31,3       | 342,5               | 41,6       | 292,2             | 30,3       |
| Pulses                  | 18,5      | 78,8       | 13,8   | 18,9       | 14,8             | 50,1       | 13,1                | 25,8       | 11,0   | 25,3       | 11,7      | 49,4       | 13,4                | 41,8       | 11,5              | 15,1       |
| Fruits                  | 368,3     | 33,7       | 320,6  | 14,8       | 372,9            | 44,6       | 316,5               | 20,1       | 400,6  | 49,2       | 286,3     | 18,2       | 355,5               | 29,4       | 315,0             | 27,4       |
| Meat and meat products  | 156,3     | 28,5       | 161,3  | 27,0       | 153,4            | 30,4       | 162,8               | 28,0       | 129,0  | 16,3       | 134,0     | 31,9       | 160,4               | 31,6       | 159,6             | 14,9       |
| Fish and shellfish      | 81,9      | 38,2       | 71,4   | 19,0       | 70,7             | 38,9       | 68,9                | 16,0       | 66,6   | 40,3       | 72,6      | 41,3       | 79,4                | 33,6       | 72,5              | 30,4       |
| Alcoholic Beverages     | 127,3     | 69,9       | 105,0  | 116,9      | 171,5            | 52,2       | 116,0               | 41,7       | 117,4  | 83,1       | 133,7     | 70,3       | 128,8               | 57,0       | 118,9             | 59,4       |
| Non-alcoholic Beverages | 489,8     | 50,0       | 381,1  | 32,4       | 570,4            | 5,8        | 532,7               | 39,7       | 456,9  | 21,5       | 400,2     | 13,1       | 243,9               | 18,4       | 432,6             | 26,3       |
| Sauces and condiments   | 35,2      | 25,8       | 31,4   | 33,0       | 36,6             | 17,9       | 35,4                | 30,7       | 40,5   | 37,5       | 38,6      | 30,9       | 39,4                | 42,4       | 36,4              | 26,6       |
| Ready-to-eat-meals      | 62,1      | 52,5       | 43,8   | 3,9        | 57,3             | 26,7       | 48,3                | 21,3       | 47,5   | 20,9       | 46,0      | 18,9       | 54,6                | 24,9       | 44,7              | 6,0        |
| Appetizers              | 23,5      | 73,8       | 20,7   | 45,2       | 25,3             | 82,5       | 19,8                | 33,5       | 18,5   | 40,1       | 17,5      | 57,4       | 24,0                | 77,6       | 18,9              | 38,9       |

| MAY                     | EXTREMA-DURA |            | CASTILE AND LEON |            | GALICIA |            | ASTURIAS |            | CANTABRIA |            | BASQUE COUNTRY |            | LA RIOJA |            | NAVARRRE |            | CANARY ISLAND |            |
|-------------------------|--------------|------------|------------------|------------|---------|------------|----------|------------|-----------|------------|----------------|------------|----------|------------|----------|------------|---------------|------------|
| (g/p/day)               | 2020         | Change (%) | 2020             | Change (%) | 2020    | Change (%) | 2020     | Change (%) | 2020      | Change (%) | 2020           | Change (%) | 2020     | Change (%) | 2020     | Change (%) | 2020          | Change (%) |
| Cereals and derivatives | 179,3        | 43,8       | 202,8            | 18,5       | 212,7   | 11,0       | 198,7    | 13,0       | 190,3     | -4,8       | 202,5          | 19,4       | 162,0    | 5,9        | 210,3    | 23,3       | 185,7         | 20,3       |
| Milk and dairy products | 411,2        | 35,2       | 429,2            | 21,1       | 371,4   | 12,4       | 425,5    | 6,9        | 350,7     | 11,8       | 372,2          | 10,7       | 338,3    | 24,7       | 350,2    | -7,3       | 363,2         | 21,9       |
| Eggs                    | 24,6         | 48,0       | 34,0             | 44,2       | 30,0    | 28,7       | 28,9     | 44,5       | 36,6      | 24,1       | 38,4           | 32,8       | 32,2     | 35,5       | 37,5     | 93,1       | 30,5          | 30,7       |
| Sugar and sweets        | 25,7         | 54,5       | 31,4             | 33,9       | 33,6    | 18,1       | 33,5     | 23,8       | 24,1      | 13,9       | 30,6           | 16,3       | 27,4     | 31,3       | 25,5     | 26,6       | 38,0          | 34,1       |
| Oils and fats           | 33,1         | 75,8       | 43,1             | 10,3       | 45,7    | 3,4        | 40,5     | 22,9       | 47,5      | 74,8       | 41,0           | 28,7       | 57,5     | 69,6       | 34,3     | 19,3       | 40,1          | 13,2       |
| Vegetables              | 291,8        | 42,9       | 291,8            | 31,5       | 279,9   | 14,3       | 270,4    | 24,6       | 264,2     | 18,9       | 368,8          | 41,6       | 284,7    | 42,8       | 370,0    | 64,6       | 305,6         | 23,7       |
| Pulses                  | 13,6         | 50,8       | 15,1             | 54,3       | 9,7     | 16,5       | 13,4     | 14,6       | 13,8      | -8,1       | 14,0           | 6,2        | 12,1     | 27,3       | 12,2     | -19,3      | 14,2          | 54,7       |
| Fruits                  | 324,6        | 45,5       | 388,3            | 23,8       | 335,2   | 3,9        | 358,8    | 9,5        | 292,5     | 19,6       | 398,4          | 20,7       | 288,6    | 18,9       | 374,2    | 34,4       | 293,3         | 13,3       |
| Meat and meat products  | 120,8        | 29,7       | 174,6            | 22,8       | 141,9   | 6,4        | 151,2    | 23,7       | 133,5     | 2,0        | 165,0          | 22,2       | 152,3    | 20,8       | 168,8    | 32,5       | 141,8         | 39,0       |
| Fish and shellfish      | 70,3         | 62,2       | 88,6             | 24,1       | 85,6    | 19,4       | 94,9     | 16,0       | 81,6      | 35,3       | 98,4           | 31,7       | 65,8     | -5,2       | 63,6     | 39,9       | 60,6          | 50,0       |
| Alcoholic Beverages     | 121,0        | 94,2       | 115,0            | 108,6      | 104,3   | 44,9       | 99,1     | 45,9       | 106,2     | 80,9       | 112,2          | 113,7      | 118,0    | 110,3      | 162,2    | 196,7      | 119,8         | 54,2       |
| Non-alcoholic Beverages | 372,8        | 69,4       | 342,2            | 40,0       | 340,6   | 15,6       | 308,7    | 28,8       | 322,2     | 16,0       | 211,0          | 14,1       | 208,7    | 1,1        | 280,8    | 84,9       | 629,5         | 13,8       |
| Sauces and condiments   | 38,7         | 47,9       | 39,3             | 31,8       | 29,7    | 15,2       | 39,0     | 35,8       | 44,7      | 48,2       | 37,6           | 30,5       | 30,1     | 28,5       | 26,9     | 12,6       | 36,6          | 37,6       |
| Ready-to-eat-meals      | 40,7         | 23,9       | 41,2             | 18,9       | 25,0    | 17,0       | 32,7     | 14,1       | 39,7      | -6,5       | 37,7           | 5,3        | 34,0     | -11,9      | 35,5     | 39,4       | 43,2          | 21,2       |
| Appetizers              | 13,9         | 70,5       | 20,7             | 76,2       | 15,5    | 38,3       | 19,0     | 52,0       | 16,1      | 7,0        | 22,9           | 65,7       | 23,2     | 43,3       | 14,9     | 65,5       | 13,1          | 14,4       |

| JUNE                    | CATALONIA |            | ARAGON |            | BALEARIC ISLANDS |            | VALENCIAN COMMUNITY |            | MURCIA |            | ANDALUSIA |            | COMMUNITY OF MADRID |            | CASTILE LA MANCHA |            |
|-------------------------|-----------|------------|--------|------------|------------------|------------|---------------------|------------|--------|------------|-----------|------------|---------------------|------------|-------------------|------------|
| (g/p/day)               | 2020      | Change (%) | 2020   | Change (%) | 2020             | Change (%) | 2020                | Change (%) | 2020   | Change (%) | 2020      | Change (%) | 2020                | Change (%) | 2020              | Change (%) |
| Cereals and derivatives | 162,4     | 7,6        | 150,0  | 18,1       | 182,7            | 6,0        | 168,3               | 9,3        | 148,2  | 6,0        | 153,7     | 12,3       | 159,3               | 20,9       | 167,3             | 16,3       |
| Milk and dairy products | 280,9     | 9,0        | 308,7  | 21,9       | 296,4            | -4,0       | 299,9               | 9,8        | 312,8  | 24,9       | 288,9     | 11,1       | 320,0               | 15,2       | 338,1             | 9,8        |
| Eggs                    | 29,0      | 22,8       | 30,7   | 23,8       | 24,0             | 4,7        | 26,5                | 12,2       | 24,2   | 7,4        | 24,0      | 18,9       | 29,6                | 39,7       | 22,4              | 14,5       |
| Sugar and sweets        | 23,9      | 27,4       | 20,7   | 30,5       | 28,6             | 47,8       | 21,3                | 15,3       | 21,8   | 14,2       | 20,0      | 34,1       | 20,3                | 32,8       | 21,6              | 18,1       |
| Oils and fats           | 31,6      | 9,9        | 35,5   | 54,8       | 44,5             | 15,1       | 27,5                | 27,5       | 20,3   | 19,9       | 31,5      | 16,3       | 37,1                | 51,0       | 27,3              | 23,7       |
| Vegetables              | 331,2     | 20,5       | 356,6  | 15,9       | 343,4            | 23,1       | 285,5               | 13,0       | 280,5  | 28,4       | 269,0     | 10,9       | 301,4               | 25,7       | 267,5             | 22,2       |
| Pulses                  | 15,3      | 16,8       | 12,7   | 7,7        | 13,4             | 17,0       | 12,3                | 27,0       | 10,7   | 35,5       | 9,8       | 14,6       | 12,4                | 32,1       | 9,8               | 6,6        |
| Fruits                  | 348,3     | 12,2       | 373,3  | 20,3       | 362,7            | 26,1       | 328,2               | 8,8        | 351,1  | 30,2       | 282,6     | 6,9        | 355,8               | 17,9       | 328,6             | 21,2       |
| Meat and meat products  | 139,6     | 12,7       | 164,6  | 28,6       | 139,3            | 18,0       | 143,9               | 17,4       | 119,0  | 27,1       | 125,6     | 17,6       | 139,4               | 27,7       | 156,9             | 24,5       |
| Fish and shellfish      | 72,8      | 18,7       | 77,0   | 16,2       | 56,6             | 0,8        | 64,0                | 7,3        | 57,5   | 7,9        | 63,8      | 13,5       | 73,0                | 23,1       | 68,3              | 19,3       |
| Alcoholic Beverages     | 115,6     | 31,9       | 108,4  | 69,1       | 143,6            | 30,2       | 104,9               | 22,0       | 95,3   | 13,0       | 119,8     | 35,3       | 118,1               | 40,3       | 113,3             | 30,3       |
| Non-alcoholic Beverages | 451,9     | 2,3        | 374,2  | -1,8       | 543,9            | -10,8      | 496,6               | 20,2       | 431,8  | -5,2       | 417,2     | 15,4       | 258,7               | 20,7       | 445,0             | 13,6       |
| Sauces and condiments   | 32,1      | 24,6       | 33,0   | 38,0       | 27,6             | -9,9       | 31,6                | 11,9       | 31,1   | 6,2        | 34,2      | 21,4       | 34,6                | 31,2       | 33,7              | 9,9        |
| Ready-to-eat-meals      | 63,5      | 13,1       | 49,0   | 21,9       | 48,5             | -9,9       | 48,1                | 11,6       | 46,7   | 14,8       | 46,5      | 18,8       | 53,0                | 8,1        | 50,8              | 24,1       |
| Appetizers              | 21,5      | 15,7       | 21,5   | 46,8       | 21,2             | 20,1       | 18,5                | 24,8       | 14,5   | 8,9        | 15,3      | 22,7       | 21,2                | 44,5       | 17,1              | 42,8       |

| JUNE                    | EXTREMA-DURA |            | CASTILE AND LEON |            | GALICIA |            | ASTURIAS |            | CANTABRIA |            | BASQUE COUNTRY |            | LA RIOJA |            | NAVARRRE |            | CANARY ISLAND |            |
|-------------------------|--------------|------------|------------------|------------|---------|------------|----------|------------|-----------|------------|----------------|------------|----------|------------|----------|------------|---------------|------------|
| (g/p/day)               | 2020         | Change (%) | 2020             | Change (%) | 2020    | Change (%) | 2020     | Change (%) | 2020      | Change (%) | 2020           | Change (%) | 2020     | Change (%) | 2020     | Change (%) | 2020          | Change (%) |
| Cereals and derivatives | 149,3        | 14,3       | 181,8            | 13,9       | 197,0   | 5,3        | 197,1    | 20,9       | 179,9     | 8,8        | 182,5          | 6,0        | 153,4    | 15,8       | 174,7    | 9,4        | 173,9         | 16,2       |
| Milk and dairy products | 341,1        | 23,6       | 378,2            | 14,6       | 385,9   | 12,4       | 408,1    | 25,3       | 336,0     | 9,8        | 345,2          | 6,0        | 307,6    | 24,3       | 384,2    | 45,6       | 350,0         | 11,9       |
| Eggs                    | 22,7         | 26,3       | 27,0             | 12,1       | 32,4    | 24,2       | 28,7     | 35,7       | 33,0      | 30,0       | 32,6           | 16,8       | 43,5     | 113,6      | 40,8     | 69,2       | 22,9          | 11,7       |
| Sugar and sweets        | 21,7         | 40,9       | 26,3             | 27,3       | 30,2    | 2,4        | 33,2     | 27,6       | 28,1      | 65,8       | 24,6           | 3,3        | 24,6     | 34,2       | 29,8     | 46,7       | 32,7          | 29,0       |
| Oils and fats           | 24,2         | 18,2       | 43,5             | 53,5       | 46,4    | 5,9        | 41,7     | 42,3       | 34,8      | -5,8       | 46,7           | 49,3       | 39,2     | 67,5       | 33,0     | 47,3       | 34,7          | 1,7        |
| Vegetables              | 279,0        | 7,1        | 254,1            | 17,9       | 293,0   | 20,7       | 253,7    | 21,1       | 253,2     | 15,6       | 324,7          | 26,0       | 288,3    | 42,7       | 277,5    | 29,6       | 273,4         | 22,7       |
| Pulses                  | 12,6         | 25,0       | 13,4             | 31,1       | 8,8     | 14,3       | 11,4     | 17,8       | 15,1      | 33,0       | 12,3           | 9,2        | 12,7     | 129,9      | 7,7      | -12,6      | 12,4          | 36,4       |
| Fruits                  | 296,8        | 6,7        | 381,1            | 21,3       | 350,0   | 7,8        | 384,6    | 21,4       | 266,0     | -11,6      | 377,5          | 5,0        | 274,5    | 11,6       | 377,8    | 30,1       | 306,9         | -4,2       |
| Meat and meat products  | 118,4        | 18,6       | 155,3            | 14,3       | 152,7   | 10,7       | 135,6    | 20,9       | 144,4     | 39,4       | 147,5          | 24,5       | 164,9    | 32,8       | 180,2    | 42,7       | 128,7         | 24,2       |
| Fish and shellfish      | 66,5         | 46,9       | 82,9             | 12,2       | 91,5    | 14,1       | 92,7     | 35,6       | 72,9      | 25,1       | 78,7           | 7,6        | 59,0     | 14,8       | 59,2     | 22,4       | 54,2          | 33,4       |
| Alcoholic Beverages     | 95,8         | 35,2       | 106,2            | 57,5       | 97,0    | 37,4       | 77,1     | 22,4       | 91,5      | 83,1       | 106,6          | 70,1       | 114,5    | 58,3       | 99,9     | 28,4       | 104,1         | 41,5       |
| Non-alcoholic Beverages | 353,6        | 37,2       | 297,8            | 14,1       | 384,0   | 30,8       | 305,1    | 25,9       | 292,0     | 12,1       | 206,2          | 25,6       | 262,8    | 6,7        | 307,3    | 53,1       | 676,4         | 26,2       |
| Sauces and condiments   | 32,6         | 20,9       | 37,6             | 48,1       | 28,0    | 13,6       | 36,2     | 32,6       | 38,6      | 31,4       | 33,5           | 29,6       | 28,1     | 19,7       | 30,9     | 21,9       | 34,4          | 19,3       |
| Ready-to-eat-meals      | 38,9         | 18,5       | 42,1             | 29,3       | 30,4    | 30,4       | 32,2     | 16,8       | 39,1      | 6,2        | 42,3           | 13,3       | 47,1     | 6,4        | 39,8     | 37,4       | 45,5          | 42,4       |
| Appetizers              | 12,7         | 42,7       | 16,8             | 42,1       | 14,3    | 28,2       | 16,8     | 36,1       | 15,3      | 21,8       | 22,0           | 50,8       | 17,7     | 48,2       | 18,6     | 27,7       | 13,9          | 21,0       |

| JULY                    | CATALONIA |            | ARAGON |            | BALEARIC ISLANDS |            | VALENCIAN COMMUNITY |            | MURCIA |            | ANDALUSIA |            | COMMUNITY OF MADRID |            | CASTILE LA MANCHA |            |
|-------------------------|-----------|------------|--------|------------|------------------|------------|---------------------|------------|--------|------------|-----------|------------|---------------------|------------|-------------------|------------|
| (g/p/day)               | 2020      | Change (%) | 2020   | Change (%) | 2020             | Change (%) | 2020                | Change (%) | 2020   | Change (%) | 2020      | Change (%) | 2020                | Change (%) | 2020              | Change (%) |
| Cereals and derivatives | 146,6     | 2,2        | 126,0  | 16,8       | 170,0            | 14,2       | 154,2               | 10,5       | 133,8  | 7,1        | 140,9     | 4,3        | 132,9               | 12,8       | 151,1             | 13,8       |
| Milk and dairy products | 277,5     | 8,0        | 290,3  | 16,9       | 301,2            | -4,4       | 273,3               | 9,7        | 265,0  | 18,8       | 273,6     | 12,9       | 291,5               | 11,6       | 326,4             | 16,1       |
| Eggs                    | 29,2      | 32,8       | 28,8   | 18,1       | 26,7             | 33,0       | 25,3                | 10,1       | 24,8   | 22,8       | 24,7      | 19,6       | 22,9                | 11,8       | 20,9              | 7,2        |
| Sugar and sweets        | 18,9      | 28,4       | 17,5   | 11,4       | 22,5             | 39,0       | 17,4                | 26,1       | 18,4   | 27,3       | 15,1      | 2,7        | 15,4                | 9,1        | 18,8              | 22,1       |
| Oils and fats           | 31,9      | 15,7       | 28,2   | 31,5       | 33,8             | -10,7      | 24,4                | 22,5       | 17,7   | -10,4      | 29,9      | 6,2        | 23,0                | 1,0        | 21,6              | 2,3        |
| Vegetables              | 335,1     | 17,2       | 370,5  | 45,0       | 288,8            | 14,7       | 272,6               | 9,5        | 230,0  | 11,6       | 264,8     | 10,2       | 245,0               | 8,2        | 244,4             | 10,4       |
| Pulses                  | 13,1      | 9,8        | 15,1   | 74,3       | 12,4             | 22,7       | 10,6                | 16,4       | 7,8    | 16,5       | 7,7       | 4,6        | 9,3                 | 8,9        | 9,9               | 31,6       |
| Fruits                  | 374,7     | 11,4       | 354,3  | 18,6       | 358,4            | 1,2        | 347,5               | 8,4        | 336,2  | 17,0       | 302,9     | 10,3       | 318,3               | 4,3        | 324,1             | 20,3       |
| Meat and meat products  | 124,2     | 12,2       | 144,6  | 31,5       | 129,6            | 23,6       | 129,3               | 20,1       | 108,0  | 17,5       | 110,1     | 8,2        | 114,1               | 8,2        | 141,1             | 26,9       |
| Fish and shellfish      | 68,9      | 11,5       | 68,1   | 14,0       | 60,4             | 8,0        | 63,7                | 14,5       | 52,9   | 20,8       | 63,0      | 9,9        | 60,6                | 9,6        | 68,6              | 34,4       |
| Alcoholic Beverages     | 109,9     | 22,3       | 90,6   | 51,6       | 159,4            | 24,8       | 112,6               | 30,4       | 115,4  | 51,4       | 127,7     | 44,6       | 108,3               | 40,2       | 119,3             | 41,9       |
| Non-alcoholic Beverages | 496,9     | 4,2        | 342,4  | -4,0       | 711,5            | -3,9       | 515,8               | 15,1       | 402,0  | -12,3      | 438,9     | 17,3       | 271,5               | 13,3       | 487,7             | -0,3       |
| Sauces and condiments   | 29,0      | 10,3       | 28,2   | 14,8       | 33,4             | 12,1       | 30,8                | 18,4       | 30,8   | -2,1       | 31,3      | 16,9       | 30,8                | 19,0       | 30,2              | 2,6        |
| Ready-to-eat-meals      | 61,6      | 11,3       | 45,8   | 5,4        | 60,1             | 30,3       | 47,5                | 8,0        | 46,6   | 16,8       | 43,2      | 13,0       | 52,1                | 7,5        | 45,8              | 13,0       |
| Appetizers              | 21,6      | 13,0       | 17,5   | -0,3       | 21,9             | 26,0       | 17,6                | 18,8       | 14,4   | 13,1       | 15,2      | 20,6       | 17,2                | 21,5       | 16,4              | 20,4       |

| JULY                    | EXTREMA-DURA |            | CASTILE AND LEON |            | GALICIA |            | ASTURIAS |            | CANTABRIA |            | BASQUE COUNTRY |            | LA RIOJA |            | NAVARRRE |            | CANARY ISLAND |            |
|-------------------------|--------------|------------|------------------|------------|---------|------------|----------|------------|-----------|------------|----------------|------------|----------|------------|----------|------------|---------------|------------|
| (g/p/day)               | 2020         | Change (%) | 2020             | Change (%) | 2020    | Change (%) | 2020     | Change (%) | 2020      | Change (%) | 2020           | Change (%) | 2020     | Change (%) | 2020     | Change (%) | 2020          | Change (%) |
| Cereals and derivatives | 136,6        | 1,8        | 159,6            | -2,6       | 184,1   | 1,0        | 203,1    | 26,8       | 177,8     | 2,7        | 149,5          | -4,3       | 133,4    | 7,3        | 161,3    | -17,6      | 149,8         | 5,5        |
| Milk and dairy products | 346,1        | 12,5       | 341,3            | 2,6        | 371,5   | 13,9       | 392,5    | 13,5       | 316,3     | 0,5        | 323,7          | 6,5        | 276,2    | -6,6       | 315,3    | -6,9       | 320,8         | 6,7        |
| Eggs                    | 23,4         | 22,4       | 23,6             | -10,8      | 31,0    | 22,3       | 26,7     | 21,8       | 28,0      | -8,2       | 30,8           | 25,1       | 31,5     | 66,7       | 25,4     | 9,7        | 20,8          | -12,6      |
| Sugar and sweets        | 15,5         | -4,0       | 19,9             | 6,6        | 27,2    | 17,3       | 22,3     | -41,4      | 24,1      | 28,1       | 22,9           | 19,1       | 22,7     | 33,7       | 21,1     | 8,6        | 28,2          | 27,8       |
| Oils and fats           | 24,5         | 3,0        | 31,2             | -6,4       | 41,7    | 21,3       | 33,3     | 21,6       | 33,5      | 10,1       | 38,8           | 33,6       | 30,9     | 4,5        | 32,9     | 4,6        | 28,4          | 39,6       |
| Vegetables              | 277,7        | -18,5      | 273,1            | -4,9       | 332,6   | -4,3       | 262,1    | 25,9       | 277,1     | 18,3       | 296,8          | 29,2       | 243,1    | 17,7       | 342,8    | -30,1      | 219,9         | 3,3        |
| Pulses                  | 9,0          | -41,7      | 9,4              | 14,0       | 7,6     | 25,9       | 12,0     | 31,8       | 13,1      | 15,4       | 11,2           | 38,3       | 7,6      | 14,6       | 9,7      | 13,9       | 8,6           | 0,9        |
| Fruits                  | 331,2        | 5,2        | 370,5            | 5,5        | 375,6   | 14,3       | 392,4    | 19,3       | 309,2     | 8,4        | 346,5          | -1,3       | 304,9    | 10,8       | 361,1    | -6,1       | 292,2         | -7,7       |
| Meat and meat products  | 103,5        | -3,9       | 147,1            | 8,9        | 133,1   | 8,7        | 129,4    | 22,6       | 134,1     | 19,6       | 129,0          | 15,3       | 121,3    | 19,8       | 140,7    | 13,6       | 118,3         | 18,9       |
| Fish and shellfish      | 57,2         | 9,3        | 76,6             | 12,0       | 93,1    | 11,8       | 88,9     | 26,0       | 70,5      | 6,8        | 75,0           | 19,7       | 54,7     | 14,3       | 59,9     | 9,0        | 42,2          | -8,2       |
| Alcoholic Beverages     | 118,1        | 44,2       | 92,6             | 22,0       | 96,2    | 28,5       | 84,2     | 62,8       | 87,0      | 22,0       | 93,6           | 58,8       | 84,1     | 13,9       | 94,7     | 80,7       | 90,3          | 18,1       |
| Non-alcoholic Beverages | 422,7        | 22,5       | 305,8            | 3,8        | 350,0   | 24,0       | 330,7    | 21,3       | 276,1     | -12,8      | 160,8          | -7,6       | 261,1    | 25,0       | 216,8    | -10,2      | 582,5         | 4,5        |
| Sauces and condiments   | 32,3         | 12,9       | 30,7             | 5,0        | 27,0    | 2,2        | 29,9     | -4,2       | 35,8      | 3,2        | 29,4           | 4,6        | 19,8     | 12,4       | 24,4     | -13,3      | 29,4          | 11,6       |
| Ready-to-eat-meals      | 34,1         | 8,6        | 38,2             | 1,4        | 27,5    | 14,6       | 30,6     | 24,5       | 42,6      | 37,7       | 32,6           | -4,7       | 39,8     | -6,4       | 31,3     | 3,0        | 40,6          | 2,5        |
| Appetizers              | 12,5         | 40,5       | 17,4             | 21,5       | 14,1    | 19,7       | 14,8     | 11,7       | 17,7      | -9,6       | 17,3           | 11,3       | 13,6     | 21,1       | 14,9     | 27,5       | 11,3          | 14,4       |

| AUGUST                  | CATALONIA |            | ARAGON |            | BALEARIC ISLANDS |            | VALENCIAN COMMUNITY |            | MURCIA |            | ANDALUSIA |            | COMMUNITY OF MADRID |            | CASTILE LA MANCHA |            |
|-------------------------|-----------|------------|--------|------------|------------------|------------|---------------------|------------|--------|------------|-----------|------------|---------------------|------------|-------------------|------------|
| (g/p/day)               | 2020      | Change (%) | 2020   | Change (%) | 2020             | Change (%) | 2020                | Change (%) | 2020   | Change (%) | 2020      | Change (%) | 2020                | Change (%) | 2020              | Change (%) |
| Cereals and derivatives | 132,8     | -0,4       | 121,7  | 2,3        | 162,2            | 5,8        | 143,7               | 1,5        | 127,5  | -1,3       | 134,3     | 0,0        | 116,8               | 9,1        | 134,5             | 3,1        |
| Milk and dairy products | 242,6     | 3,0        | 261,1  | 11,4       | 287,8            | -6,1       | 248,9               | -1,4       | 254,6  | -3,2       | 257,3     | 5,0        | 256,2               | 3,2        | 284,9             | 6,3        |
| Eggs                    | 24,3      | 13,5       | 30,6   | 28,8       | 25,0             | 12,6       | 25,6                | 14,8       | 21,7   | 18,4       | 22,1      | 4,8        | 21,5                | 12,4       | 20,8              | 15,2       |
| Sugar and sweets        | 16,7      | 2,5        | 17,2   | 11,4       | 18,8             | -14,4      | 16,9                | 9,0        | 17,8   | 25,9       | 15,4      | 6,9        | 14,5                | 8,5        | 12,9              | -42,0      |
| Oils and fats           | 30,8      | 33,3       | 23,6   | 19,2       | 40,0             | 10,5       | 21,0                | 17,1       | 21,1   | -17,0      | 30,4      | 10,7       | 20,0                | -5,6       | 22,5              | 4,8        |
| Vegetables              | 281,5     | -1,6       | 293,2  | 5,2        | 307,4            | 3,1        | 253,5               | 3,2        | 218,5  | 10,4       | 232,6     | 5,7        | 210,0               | 6,3        | 211,0             | 10,4       |
| Pulses                  | 12,1      | 13,5       | 11,7   | 39,2       | 15,0             | 5,6        | 10,6                | 36,9       | 9,0    | 21,7       | 8,4       | 9,8        | 8,6                 | 10,8       | 9,1               | 5,4        |
| Fruits                  | 332,2     | 9,8        | 343,1  | 25,6       | 372,3            | 3,5        | 308,2               | 10,0       | 300,1  | 23,3       | 269,2     | 7,2        | 256,0               | 1,0        | 260,5             | 11,8       |
| Meat and meat products  | 111,4     | 4,0        | 124,6  | 15,1       | 129,3            | 14,7       | 114,9               | 5,7        | 94,4   | 10,1       | 106,2     | 4,0        | 99,5                | 4,5        | 129,7             | 2,7        |
| Fish and shellfish      | 62,2      | 5,4        | 58,3   | -3,2       | 53,1             | -0,9       | 58,5                | 14,8       | 53,2   | 14,7       | 56,2      | 8,6        | 51,3                | 2,5        | 55,2              | 2,1        |
| Alcoholic Beverages     | 98,6      | 19,8       | 85,1   | 55,0       | 132,6            | 9,9        | 102,6               | 17,9       | 95,0   | -17,0      | 110,0     | 12,6       | 82,9                | 11,1       | 86,2              | 13,8       |
| Non-alcoholic Beverages | 462,9     | 2,9        | 327,7  | -5,8       | 726,1            | 4,5        | 493,6               | 14,4       | 456,3  | 5,9        | 424,0     | 11,6       | 253,0               | 19,1       | 398,3             | 12,7       |
| Sauces and condiments   | 26,0      | 1,6        | 24,4   | 15,5       | 32,3             | 14,3       | 29,4                | 18,5       | 30,8   | 11,1       | 30,6      | 3,9        | 25,0                | 2,9        | 27,9              | 3,8        |
| Ready-to-eat-meals      | 52,1      | -1,5       | 36,4   | -3,8       | 49,0             | 2,9        | 42,6                | 5,4        | 47,1   | 9,2        | 40,6      | 7,3        | 42,0                | -3,9       | 37,5              | -1,8       |
| Appetizers              | 19,2      | 13,7       | 14,8   | 1,2        | 20,9             | 7,2        | 15,7                | 4,9        | 14,6   | 0,7        | 12,7      | 2,0        | 14,9                | 16,0       | 13,9              | 6,8        |

| AUGUST                  | EXTREMA-DURA |            | CASTILE AND LEON |            | GALICIA |            | ASTURIAS |            | CANTABRIA |            | BASQUE COUNTRY |            | LA RIOJA |            | NAVARRRE |            | CANARY ISLAND |            |
|-------------------------|--------------|------------|------------------|------------|---------|------------|----------|------------|-----------|------------|----------------|------------|----------|------------|----------|------------|---------------|------------|
| (g/p/day)               | 2020         | Change (%) | 2020             | Change (%) | 2020    | Change (%) | 2020     | Change (%) | 2020      | Change (%) | 2020           | Change (%) | 2020     | Change (%) | 2020     | Change (%) | 2020          | Change (%) |
| Cereals and derivatives | 117,8        | -7,7       | 153,2            | -4,6       | 183,6   | 5,8        | 176,0    | 12,3       | 143,7     | 3,9        | 164,9          | 20,8       | 136,7    | 20,4       | 167,0    | 9,3        | 139,3         | 0,9        |
| Milk and dairy products | 289,0        | -9,7       | 343,4            | 2,1        | 318,9   | 8,9        | 333,0    | 0,1        | 352,3     | 2,8        | 300,4          | 2,8        | 292,6    | 4,6        | 320,3    | 11,8       | 260,7         | -11,3      |
| Eggs                    | 19,9         | -8,4       | 25,0             | -0,9       | 28,3    | 27,6       | 28,7     | 24,7       | 28,3      | 14,9       | 26,6           | 4,9        | 32,7     | 47,2       | 24,3     | -8,2       | 19,5          | -3,4       |
| Sugar and sweets        | 17,1         | 4,7        | 17,8             | -15,9      | 27,7    | 7,8        | 29,8     | 11,7       | 20,7      | -4,8       | 18,3           | -1,6       | 22,6     | 37,5       | 13,4     | -27,5      | 22,8          | 4,1        |
| Oils and fats           | 22,5         | -17,9      | 40,8             | 42,3       | 40,9    | -7,6       | 34,5     | 7,1        | 45,8      | 45,8       | 35,1           | 38,0       | 26,1     | -27,3      | 39,6     | 20,9       | 25,1          | 2,6        |
| Vegetables              | 233,7        | -23,4      | 256,0            | -5,3       | 278,3   | -11,8      | 233,5    | 7,6        | 223,8     | -13,2      | 269,8          | 13,8       | 274,7    | 41,2       | 398,5    | 71,1       | 194,6         | -5,3       |
| Pulses                  | 8,6          | -4,3       | 9,5              | 35,5       | 9,0     | 22,3       | 11,3     | 14,0       | 8,8       | -19,2      | 9,4            | 38,0       | 6,7      | -35,2      | 6,4      | -1,7       | 9,3           | 16,4       |
| Fruits                  | 257,6        | -13,9      | 350,8            | 5,6        | 340,9   | 7,7        | 345,5    | 13,4       | 311,8     | 29,5       | 317,1          | 5,4        | 363,7    | 46,8       | 359,7    | 37,2       | 251,1         | -9,6       |
| Meat and meat products  | 103,2        | -3,5       | 129,9            | -6,1       | 126,2   | 7,1        | 119,0    | 15,7       | 126,0     | -6,3       | 121,3          | 20,1       | 104,5    | 9,4        | 126,4    | 22,8       | 99,0          | 8,4        |
| Fish and shellfish      | 47,9         | -6,6       | 70,9             | 6,2        | 82,5    | 13,0       | 78,7     | 16,2       | 58,0      | 3,9        | 70,7           | 25,9       | 56,1     | 15,0       | 63,4     | 22,0       | 43,4          | 9,5        |
| Alcoholic Beverages     | 94,3         | 23,0       | 85,0             | 33,9       | 82,7    | 21,2       | 78,0     | 30,8       | 89,8      | 12,1       | 91,5           | 53,4       | 99,3     | 103,2      | 107,0    | 62,5       | 85,1          | 43,0       |
| Non-alcoholic Beverages | 355,0        | 14,6       | 320,8            | 24,0       | 329,3   | 18,6       | 309,5    | 30,0       | 295,5     | -14,7      | 167,5          | 3,1        | 226,2    | -5,1       | 224,7    | -7,7       | 599,2         | 2,6        |
| Sauces and condiments   | 27,3         | 2,9        | 30,1             | 4,4        | 27,3    | 34,3       | 29,6     | -3,3       | 35,2      | 14,2       | 29,0           | 20,4       | 22,6     | 15,2       | 31,9     | 8,5        | 28,6          | 8,0        |
| Ready-to-eat-meals      | 36,3         | -0,4       | 31,9             | -13,2      | 24,2    | 28,4       | 26,3     | 2,4        | 36,4      | -0,1       | 32,3           | -4,8       | 47,7     | 39,9       | 40,8     | 37,8       | 37,4          | 9,2        |
| Appetizers              | 10,7         | -2,3       | 13,9             | 7,4        | 12,6    | 16,5       | 12,9     | 16,6       | 11,8      | -18,2      | 16,1           | 37,2       | 14,6     | 67,1       | 12,0     | 13,9       | 14,0          | 34,0       |



**Table S2.** Energy intake by regions. Year 2020 and change versus 2019.

|                      | JAN   |            | FEB   |            | MAR   |            | APR   |            | MAY   |            | JUN   |            | JUL   |            | AUG   |            |
|----------------------|-------|------------|-------|------------|-------|------------|-------|------------|-------|------------|-------|------------|-------|------------|-------|------------|
| REGIONS (kcal/p/day) | 2020  | Change (%) |
| ANDALUSIA            | 1.936 | 6,3        | 2.080 | 12,2       | 2.481 | 31,3       | 2.700 | 36,7       | 2.361 | 32,0       | 2.105 | 15,3       | 1.955 | 9,1        | 1.856 | 4,9        |
| ARAGON               | 2.073 | 11,9       | 2.106 | 6,4        | 2.345 | 25,3       | 2.838 | 49,4       | 2.335 | 29,0       | 2.278 | 26,4       | 2.008 | 20,4       | 1.783 | 8,9        |
| ASTURIAS             | 2.310 | 7,4        | 2.331 | 11,5       | 2.632 | 28,3       | 2.994 | 52,2       | 2.574 | 19,1       | 2.486 | 25,1       | 2.351 | 18,7       | 2.182 | 9,4        |
| BALEARIC ISLANDS     | 2.404 | 12,5       | 2.524 | 5,8        | 3.185 | 42,4       | 3.355 | 30,3       | 2.853 | 27,8       | 2.516 | 10,5       | 2.385 | 10,8       | 2.347 | 4,2        |
| CANARY ISLAND        | 2.004 | 1,6        | 2.169 | 7,1        | 2.850 | 42,1       | 2.979 | 49,3       | 2.587 | 24,1       | 2.428 | 19,5       | 2.092 | 11,4       | 1.874 | 2,1        |
| CANTABRIA            | 2.157 | -9,3       | 2.373 | -2,4       | 2.848 | 35,0       | 2.824 | 37,5       | 2.477 | 13,2       | 2.335 | 14,9       | 2.298 | 10,1       | 2.156 | 7,3        |
| CATALONIA            | 2.175 | 4,3        | 2.317 | 8,3        | 2.597 | 19,5       | 2.851 | 34,8       | 2.610 | 22,5       | 2.318 | 13,1       | 2.181 | 10,6       | 1.967 | 7,4        |
| CASTILE LA MANCHA    | 1.977 | -5,6       | 2.040 | 5,3        | 2.403 | 26,9       | 2.637 | 35,0       | 2.395 | 26,8       | 2.235 | 20,0       | 2.031 | 15,8       | 1.775 | 3,0        |
| VALENCIAN COMMUNITY  | 2.051 | 6,1        | 2.134 | 8,3        | 2.509 | 24,0       | 2.679 | 36,1       | 2.419 | 21,8       | 2.214 | 14,4       | 2.062 | 13,8       | 1.888 | 6,7        |
| CASTILE AND LEON     | 2.278 | 3,7        | 2.276 | 4,7        | 2.535 | 15,6       | 2.840 | 27,9       | 2.672 | 23,6       | 2.451 | 24,0       | 2.142 | 2,2        | 2.087 | 5,0        |
| EXTREMADURA          | 1.814 | -0,3       | 1.681 | -8,3       | 2.236 | 25,7       | 2.441 | 42,6       | 2.308 | 44,9       | 2.007 | 19,7       | 1.890 | 2,3        | 1.706 | -5,1       |
| GALICIA              | 2.354 | 1,0        | 2.370 | 3,2        | 2.705 | 21,3       | 2.952 | 28,0       | 2.574 | 13,5       | 2.536 | 9,5        | 2.406 | 9,9        | 2.243 | 4,7        |
| COMMUNITY OF MADRID  | 1.989 | 4,1        | 2.076 | 8,3        | 2.434 | 28,0       | 2.807 | 47,0       | 2.507 | 35,1       | 2.294 | 26,1       | 1.878 | 10,2       | 1.629 | 4,6        |
| MURCIA               | 1.827 | -0,1       | 2.050 | 2,3        | 2.403 | 29,7       | 2.710 | 43,2       | 2.262 | 27,8       | 1.993 | 14,4       | 1.816 | 10,6       | 1.764 | 1,0        |
| NAVARRRE             | 2.099 | 11,1       | 2.318 | 13,5       | 2.561 | 30,8       | 2.845 | 41,2       | 2.495 | 28,8       | 2.368 | 30,4       | 2.099 | -5,1       | 2.170 | 18,8       |
| BASQUE COUNTRY       | 2.199 | 3,1        | 2.307 | 1,4        | 2.609 | 18,6       | 2.976 | 36,8       | 2.672 | 25,1       | 2.493 | 19,4       | 2.154 | 12,8       | 2.047 | 17,6       |
| LA RIOJA             | 2.154 | 17,6       | 2.138 | 18,5       | 2.219 | 30,6       | 2.436 | 40,7       | 2.404 | 25,4       | 2.267 | 32,6       | 1.850 | 7,9        | 1.886 | 15,7       |
